# Supplementary material
Source: Springer Nature journal article supplement (https://www.springermedizin.de/resource/supplementary/12982_2007_64_MOESM5_ESM.pdf/9604400)

■ No. of reports indexed as trials in MEDLINE ■ Additional no. of reports of trials in EMBASE

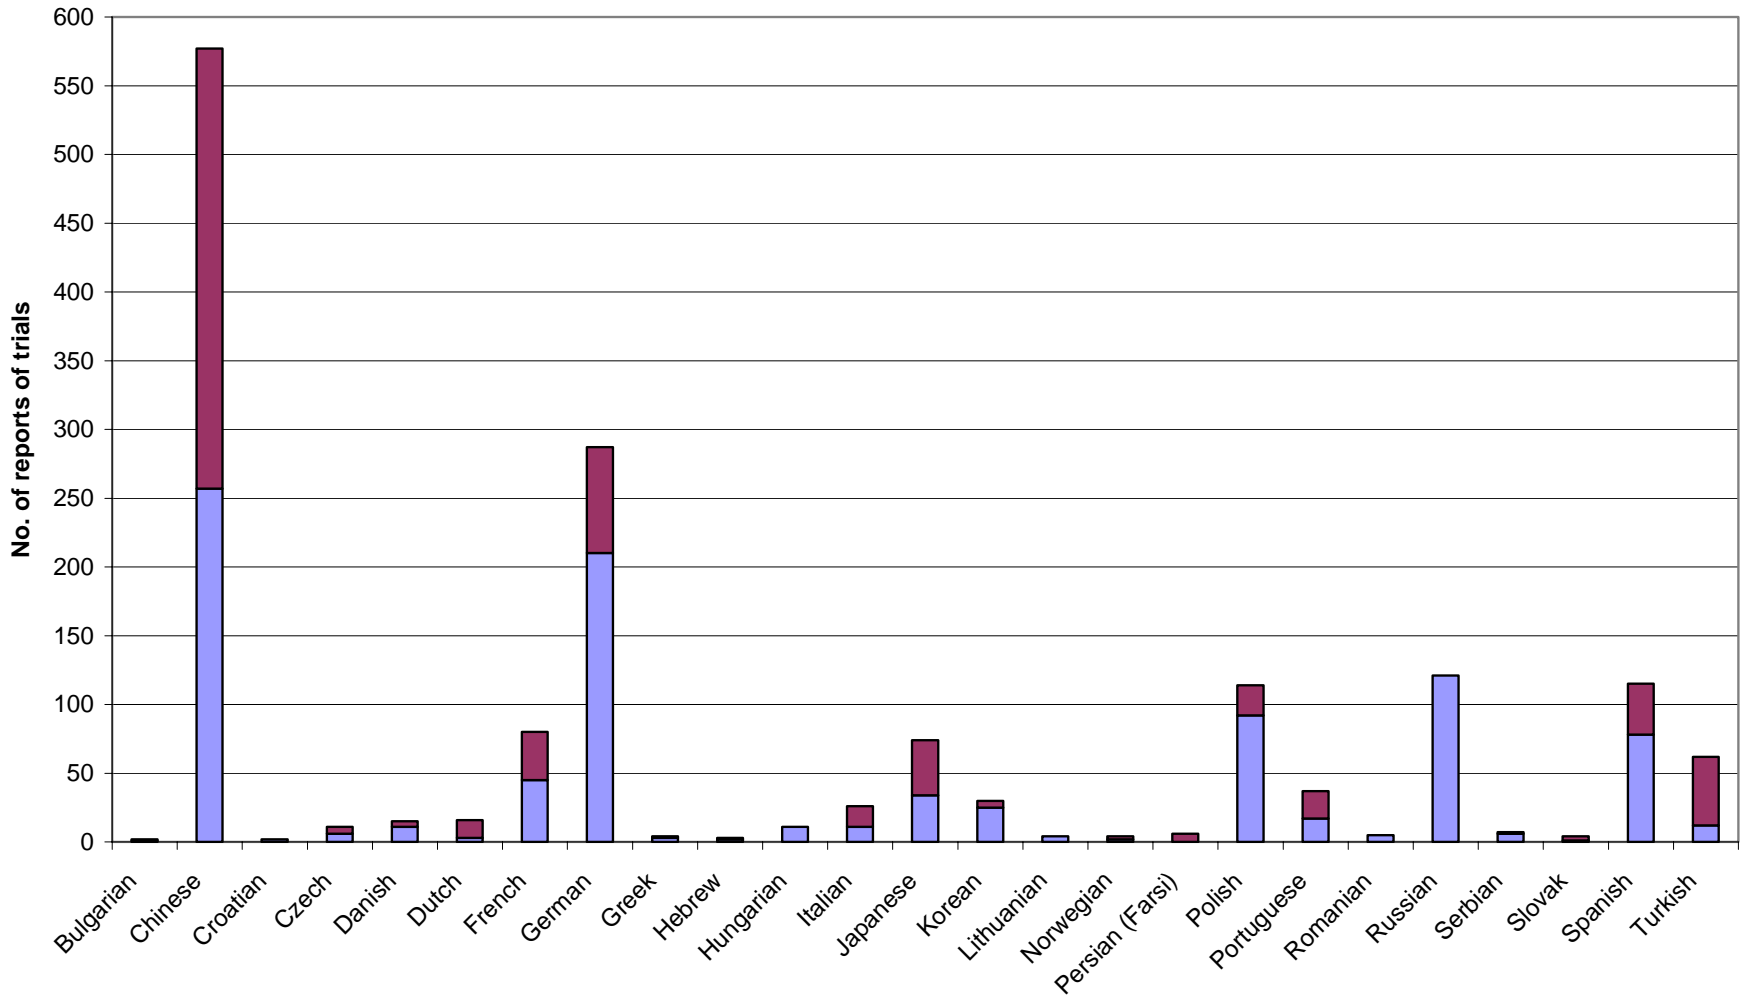

Supplement: MOESM5 [file 9604400]
